# Supplementary material for: Increased Expression of EZH2 Is Mediated by Higher Glycolysis and mTORC1 Activation in Lupus CD4+ T Cells
Source: PubMed Central journal article supplement (PMC7213603; doi:10.20900/immunometab20200013), 2020-04-09
Supplement: NIHMS1583625-supplement-Supplementary_file.pdf [file NIHMS1583625-supplement-Supplementary_file.pdf]

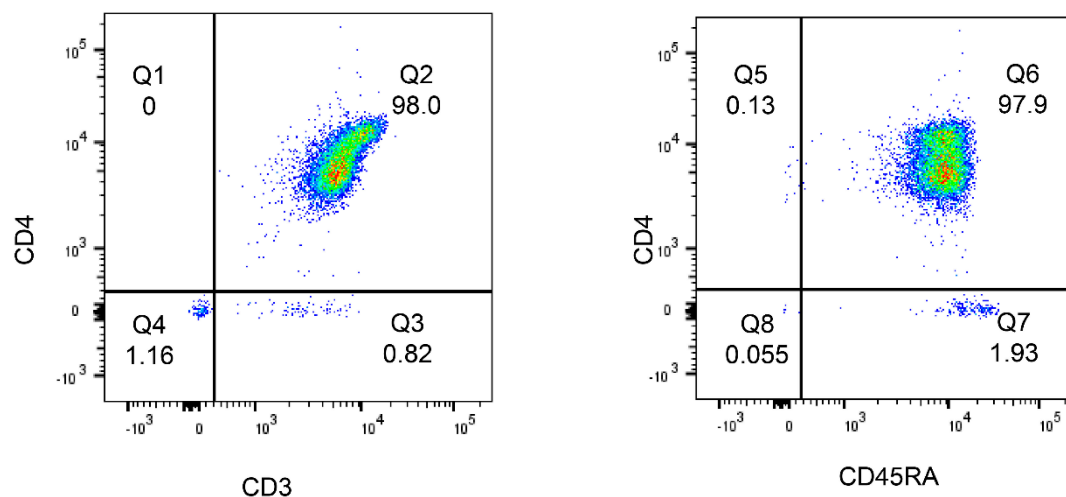

**Supplementary Figure S1.** A representative flow cytometry analysis demonstrating purity of naïve CD4<sup>+</sup> T cells isolated from peripheral blood mononuclear cells from SLE patients used in this study. The purity of naïve CD4<sup>+</sup> T cells was assessed by flow cytometry using anti-CD3, anti-CD4, and anti-CD45RA antibodies.

**Supplementary Table S1** Demographic information and SLEDAI scores of systemic lupus erythematosus patients recruited in this study.

| No. | Age | Sex | Ethnicity                                  | SLEDAI score |
|-----|-----|-----|--------------------------------------------|--------------|
| 1   | 48  | F   | European-American                          | 0            |
| 2   | 60  | F   | European-American                          | 2            |
| 3   | 56  | F   | European-American                          | 0            |
| 4   | 48  | F   | European-American                          | 4            |
| 5   | 20  | F   | Hispanic                                   | 0            |
| 6   | 53  | F   | European-American                          | 8            |
| 7   | 47  | F   | European-American                          | 2            |
| 8   | 29  | F   | Asian                                      | 12           |
| 9   | 45  | F   | European-American                          | 0            |
| 10  | 49  | F   | European-American                          | 0            |
| 11  | 48  | F   | European-American                          | 6            |
| 12  | 49  | F   | European-American                          | 0            |
| 13  | 40  | F   | European-American                          | 6            |
| 14  | 33  | F   | European-American                          | 6            |
| 15  | 63  | F   | African-American                           | 2            |
| 16  | 48  | F   | European-American                          | 5            |
| 17  | 61  | F   | European-American                          | 2            |
| 18  | 50  | F   | African-American                           | 2            |
| 19  | 41  | F   | Native Hawaiian and Other Pacific Islander | 0            |
| 20  | 38  | F   | European-American                          | 4            |
| 21  | 35  | F   | European-American                          | 6            |
| 22  | 24  | F   | European-American                          | 0            |
| 23  | 25  | F   | Asian                                      | 6            |

---

|    |    |   |                   |    |
|----|----|---|-------------------|----|
| 24 | 40 | F | European-American | 6  |
| 25 | 41 | F | European-American | 2  |
| 26 | 28 | F | African-American  | 10 |
| 27 | 40 | F | European-American | 0  |
| 28 | 46 | F | European-American | 2  |

---

SLEDAI, Systemic lupus erythematosus disease activity index.
